# Supplementary material
Source: publisher site journal article supplement (https://www.dovepress.com/article/589196)
Supplement: Supplementary file 1 [file 589196_Revised%20Supplementary%20Table.docx]

**Table S1.** Comparison of Baseline Characteristics Between Included Patients and Those Excluded Due to Missing Data

| Variables | Included patients  (n=287) | Excluded patients  (n=33) | *p* value |
| --- | --- | --- | --- |
| **Demographics** |  |  |  |
| Male, n (%) | 165(57.5) | 23(69.7) | 0.18 |
| Age (year), mean ± SD | 72.1±10.8 | 72.8±11.8 | 0.50 |
| BMI (kg/m2), mean ± SD | 22.5±3.4 | 22.6±5.9 | 0.78 |
| **Medical History, n (%)** |  |  |  |
| Smoking | 77(26.8) | 9(27.3) | 0.96 |
| Drinking | 95(31.9) | 8(24.2) | 0.38 |
| Hypertension | 171(59.6) | 23(69.7) | 0.26 |
| Diabetes | 38(13.2) | 7(21.2) | 0.21 |
| Atrial fibrillation | 61(21.3) | 6(18.2) | 0.68 |
| Stroke | 57(19.9) | 2(6.1) | 0.05 |
| **Blood Pressure (mmHg), mean** ± **SD** |  |  |  |
| Admission PP | 67.7±20.4 | 64.0±20.9 | 0.47 |
| Admission SBP | 155.5±23.1 | 146.4±24.0 | 0.58 |
| Admission DBP | 87.9±15.8 | 82.4±12.8 | 0.39 |
| **Clinical Characteristics, n (%)** |  |  |  |
| Admission NIHSS, median (IQR), | 15(7) | 15(9) | 0.77 |
| Time from onset to Reperfusion (min), mean ± SD | 604.9±306.4 | 541.1±255.7 | 0.41 |
| Thrombolysis | 118(41.1) | 11(33.3) | 0.39 |

**Abbreviations:** BMI indicates body mass index; SD, Standard Deviation; PP, pulse pressure; SBP, systolic blood pressure; DBP, diastolic blood pressure; and NIHSS, National Institutes of Health Stroke Scale.
